# Supplementary material for: Hydrophobic Modification of Biopolymer Aerogels by Cold Plasma Coating
Source: MDPI journal article supplement (doi:10.3390/polym13173000), 2021-09-04
Supplement: s1 [file s1]

# Hydrophobic Modification of Biopolymer Aerogels by Cold Plasma Coating

Baldur Schroeter <sup>1,\*</sup>, Isabella Jung <sup>1</sup>, Katharina Bauer <sup>2</sup>, Pavel Gurikov <sup>3</sup> and Irina Smirnova <sup>1</sup>

<sup>1</sup> Institute for Thermal Separation Processes, Hamburg University of Technology, Eißendorfer Straße 38, 21073 Hamburg, Germany; Isabella.Jung@tuhh.de (I.J.); Irina.Smirnova@tuhh.de (I.S.)

<sup>2</sup> Diener Electronic GmbH & Co. KG, Nagolder Straße 61, 72224 Ebhausen, Germany; Katharina-bauer@mein.gmx

<sup>3</sup> Laboratory for Development and Modelling of Novel Nanoporous Materials, Hamburg University of Technology, Eißendorfer Straße 38, 21073 Hamburg, Germany; Pavel.Gurikov@tuhh.de

\* Correspondence: baldur.schroeter@tuhh.de

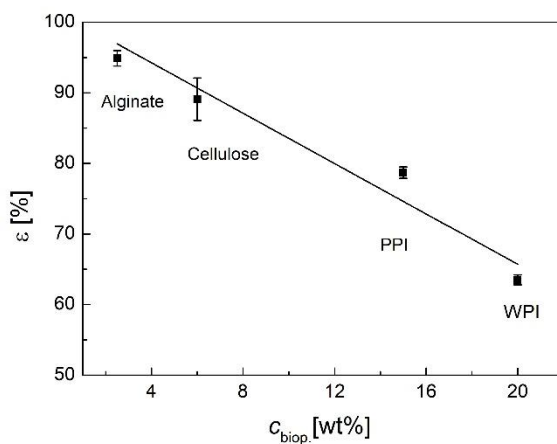

**Figure S1.** Overall porosity of different aerogels in dependence of the solid content in biopolymer stock solutions. Solid line corresponds to linear fitting, error bars correspond to the density measurement errors.

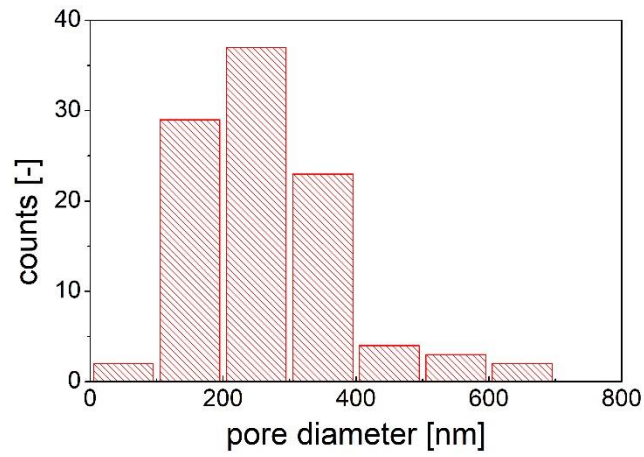

**Figure S2.** Macropore-distribution in alginate aerogel based on image analysis (100 pores) of SEM pictures.

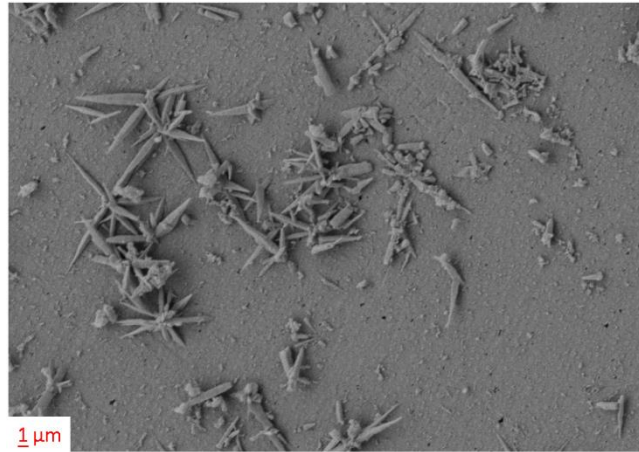

**Figure S3.** SEM picture of aerogel surface after plasma treatment. WPI aerogel, coating: PFAC-6, mode: CW,  $p_{\text{input}} = 90 \text{ W}$ ,  $t = 5 \text{ min}$ .

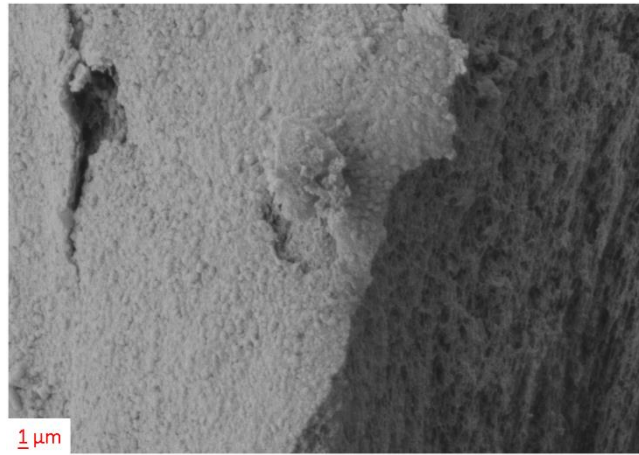

**Figure S4.** SEM picture of coating layer and aerogel pores after plasma treatment. Alginate aerogel, coating: PFAC-6, mode: CW,  $p_{\text{input}} = 90 \text{ W}$ ,  $t = 50 \text{ min}$ .

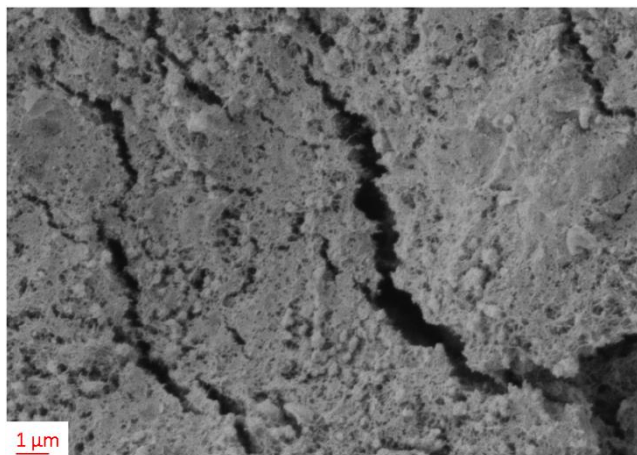

**Figure S5.** SEM picture of non-enclosed coating layer on aerogel surface after plasma treatment. Cellulose aerogel, coating: PFAC-6, mode: CW,  $p_{\text{input}} = 90 \text{ W}$ ,  $t = 5 \text{ min}$ .

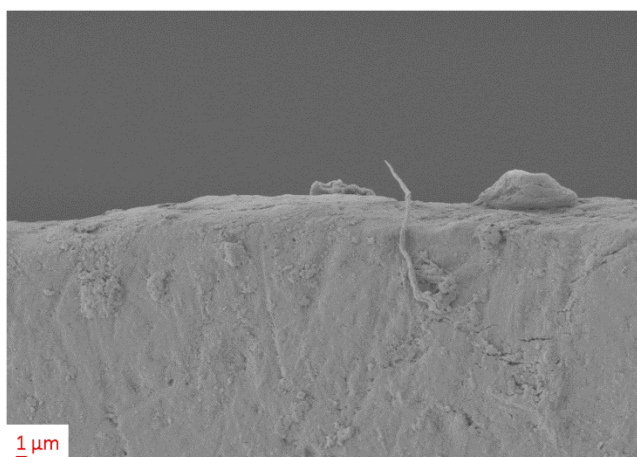

**Figure S6.** SEM picture of coating layer on aerogel surface after plasma treatment. PPI aerogel, coating: PFAC-6, mode: CW,  $p_{\text{input}} = 90 \text{ W}$ ,  $t = 5 \text{ min}$ .

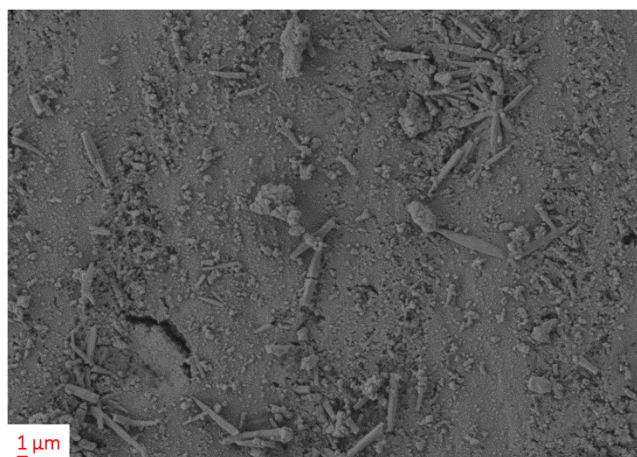

**Figure S7.** SEM picture of coating layer on aerogel surface after plasma treatment. PPI aerogel, coating: PFAC-6, mode: CW,  $p_{\text{input}} = 90 \text{ W}$ ,  $t = 50 \text{ min}$ .

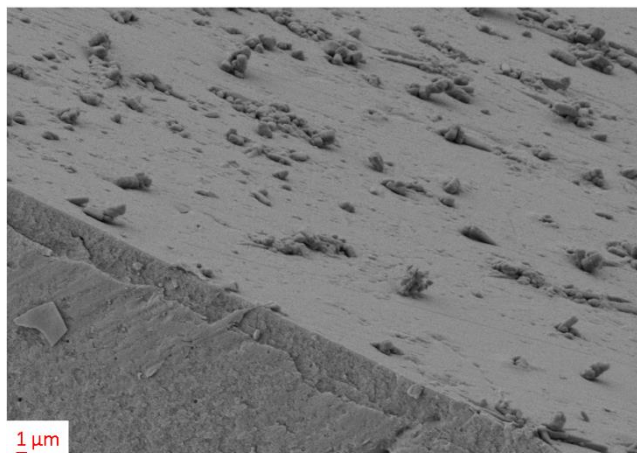

**Figure S8.** SEM picture of coating layer and aerogel pores after plasma treatment. WPI aerogel, coating: PFAC-6, mode: CW,  $p_{\text{input}} = 90 \text{ W}$ ,  $t = 50 \text{ min}$ .

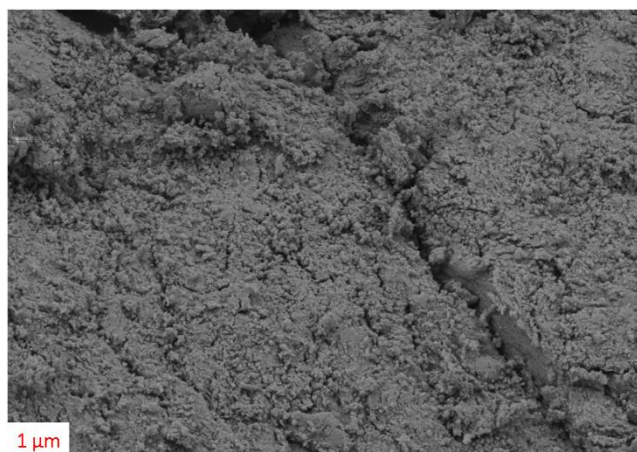

**Figure S9.** SEM picture of coating layer on aerogel surface after plasma treatment. Alginate aerogel, coating: PFAC-8, mode: CW,  $p_{\text{input}} = 30 \text{ W}$ ,  $t = 50 \text{ min}$ .

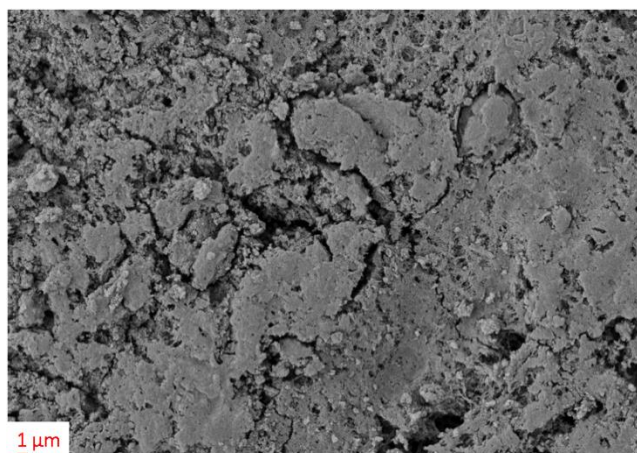

**Figure S10.** SEM picture of non-enclosed coating layer on aerogel surface after plasma treatment. Cellulose aerogel, coating: PFAC-8, mode: CW,  $p_{\text{input}} = 30 \text{ W}$ ,  $t = 50 \text{ min}$ .



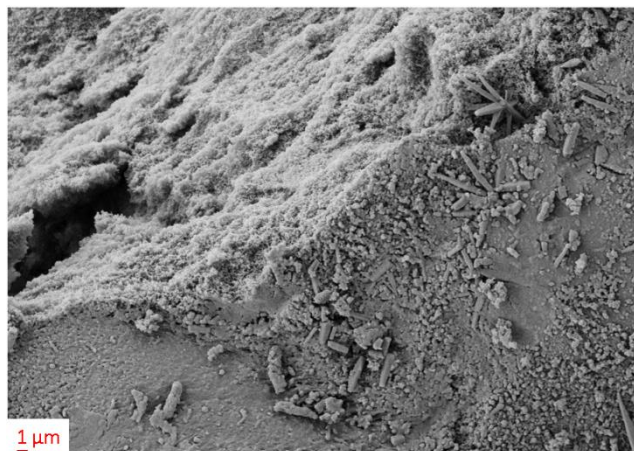

**Figure S11.** SEM picture of coating layer and aerogel pores after plasma treatment. PPI aerogel, coating: PFAC-8, mode: CW,  $p_{\text{input}} = 30 \text{ W}$ ,  $t = 50 \text{ min}$ .

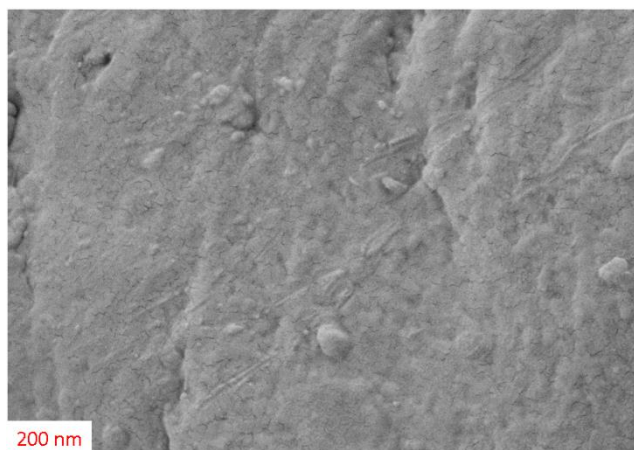

**Figure S12.** SEM picture of coating layer on aerogel surface after plasma treatment. Alginate aerogel, coating: C<sub>4</sub>F<sub>8</sub>, mode: CW,  $p_{\text{input}} = 90 \text{ W}$ ,  $t = 50 \text{ min}$ .

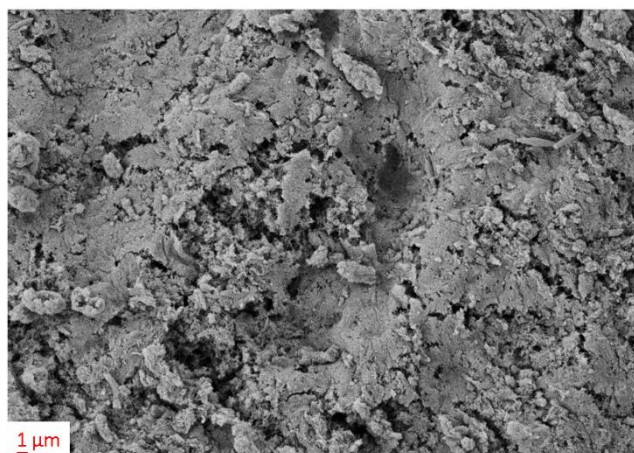

**Figure S13.** SEM picture of non-enclosed coating layer on aerogel surface after plasma treatment. Cellulose aerogel, coating: C<sub>4</sub>F<sub>8</sub>, mode: CW,  $p_{\text{input}} = 90 \text{ W}$ ,  $t = 5 \text{ min}$ .

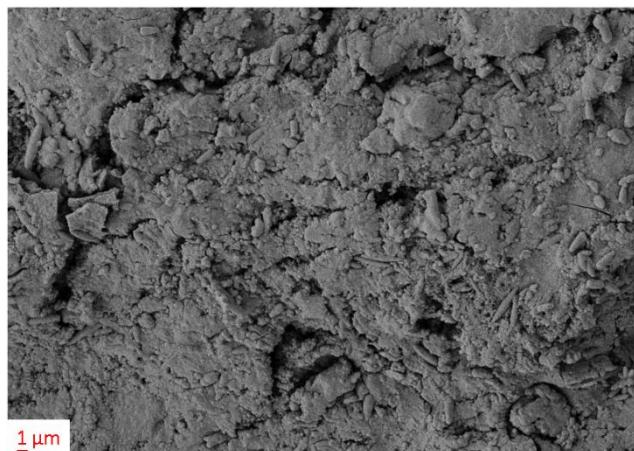

**Figure S14.** SEM picture of coating layer on aerogel surface after plasma treatment. Cellulose aerogel, coating:  $C_4F_8$ , mode: CW,  $p_{input} = 90$  W,  $t = 50$  min.

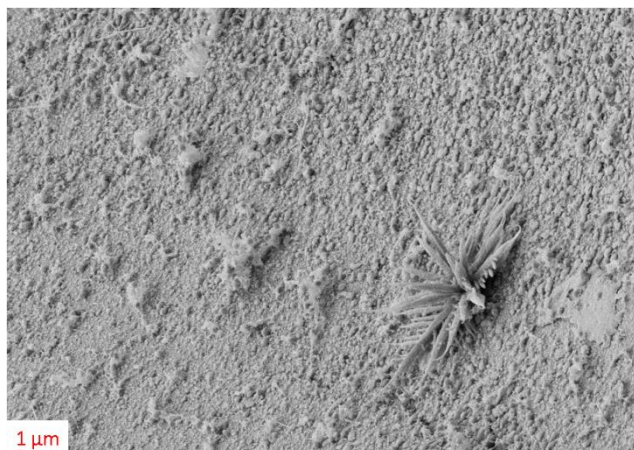

**Figure S15.** SEM picture of coating and open pores on aerogel surface after plasma treatment. PPI aerogel, coating:  $C_4F_8$ , mode: CW,  $p_{input} = 90$  W,  $t = 5$  min.

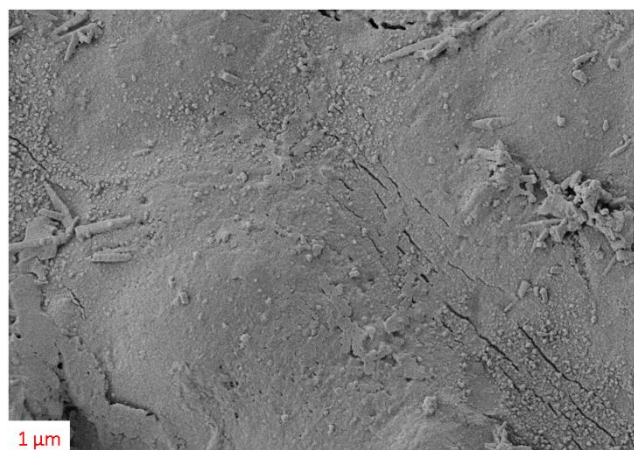

**Figure S16.** SEM picture of coating layer on aerogel surface after plasma treatment. PPI aerogel, coating:  $C_4F_8$ , mode: CW,  $p_{input} = 90$  W,  $t = 50$  min.

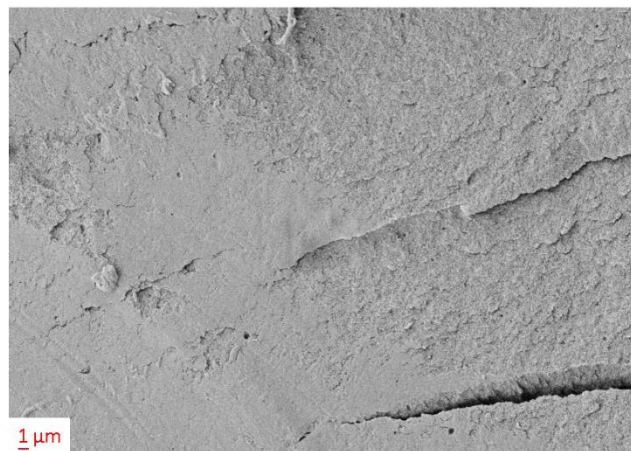

**Figure S17.** SEM picture of coating layer and area with open pores on aerogel surface after plasma treatment. WPI aerogel, coating:  $C_4F_8$ , mode: CW,  $p_{\text{input}} = 90$  W,  $t = 50$  min.

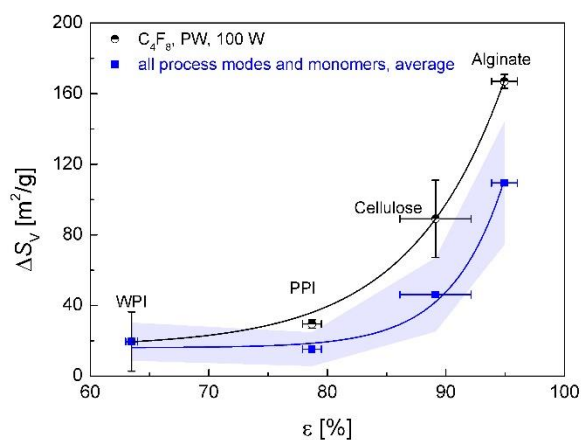

**Figure S18.** Increase of  $\Delta S_V$  in dependence of the overall porosity of the aerogels. Circles represent the values obtained with  $C_4F_8$  monomer, in PW mode with  $p_{\text{input}} = 300$  W. Squares represent the averaged values from all coating materials and process conditions, excluding PFAC-8 coating in CW mode with  $p_{\text{input}} = 90$  W. Straight lines represent exponential fitting. Error areas represent the standard deviation of  $\Delta S_V$  from averaged values at different process conditions; error bars represent the relative measurement errors (x-error) and standard deviation of  $\Delta S_V$  for the individual process condition (y-error).

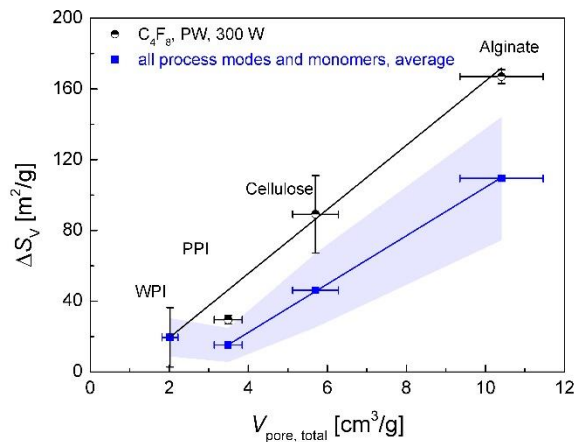

**Figure S19.** Increase of  $\Delta S_v$  in dependence of the overall pore volume of the aerogels. Circles represent the values obtained with  $\text{C}_4\text{F}_8$  monomer, in PW mode with  $p_{\text{input}} = 300 \text{ W}$ . Squares represent the averaged values from all coating materials and process conditions, excluding PFAC-8 coating in CW mode with  $p_{\text{input}} = 90 \text{ W}$ . Straight lines represent exponential fitting. Error areas represent the standard deviation of  $\Delta S_v$  from averaged values at different process conditions; error bars represent the relative measurement errors (x-error) and standard deviation of  $\Delta S_v$  for the individual process condition (y-error).

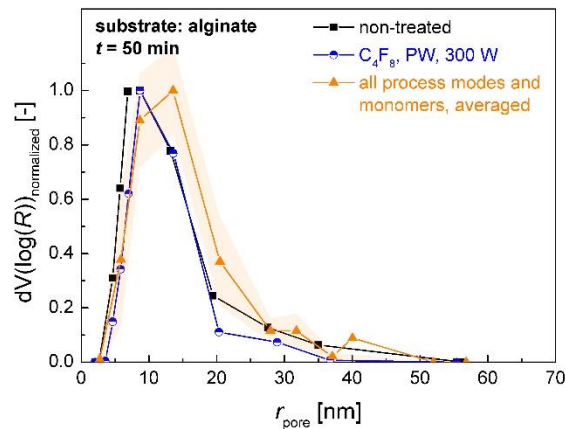

**Figure S20.** Comparison of BJH pore size distributions (normalized) from alginate aerogels prior and after the plasma coating process. Round data points represent the values obtained after coating with  $\text{C}_4\text{F}_8$  in PW mode with  $p_{\text{input}} = 300 \text{ W}$ , triangular data points represent the averaged values obtained after all other coating process conditions, excluding PFAC-8 coating in CW mode with  $p_{\text{input}} = 90 \text{ W}$ . Error areas represent the standard deviation from averaged values.



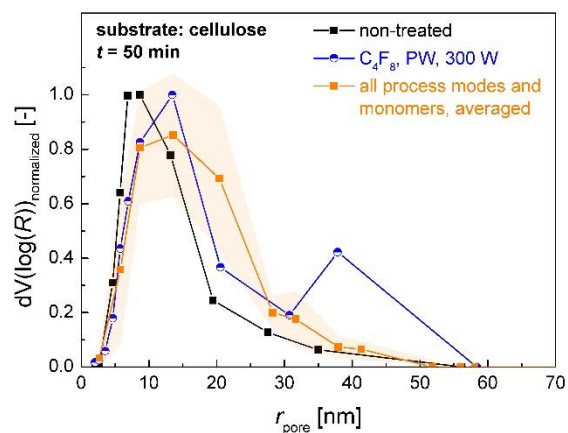

**Figure S21.** Comparison of BJH pore size distributions (normalized) from cellulose aerogels prior and after the plasma coating process. Round data points represent the values obtained after coating with C<sub>4</sub>F<sub>8</sub> in PW mode with  $p_{\text{input}} = 300$  W, triangular data points represent the averaged values obtained after all other coating process conditions, excluding PFAC-8 coating in CW mode with  $p_{\text{input}} = 90$  W. Error areas represent the standard deviation from averaged values.

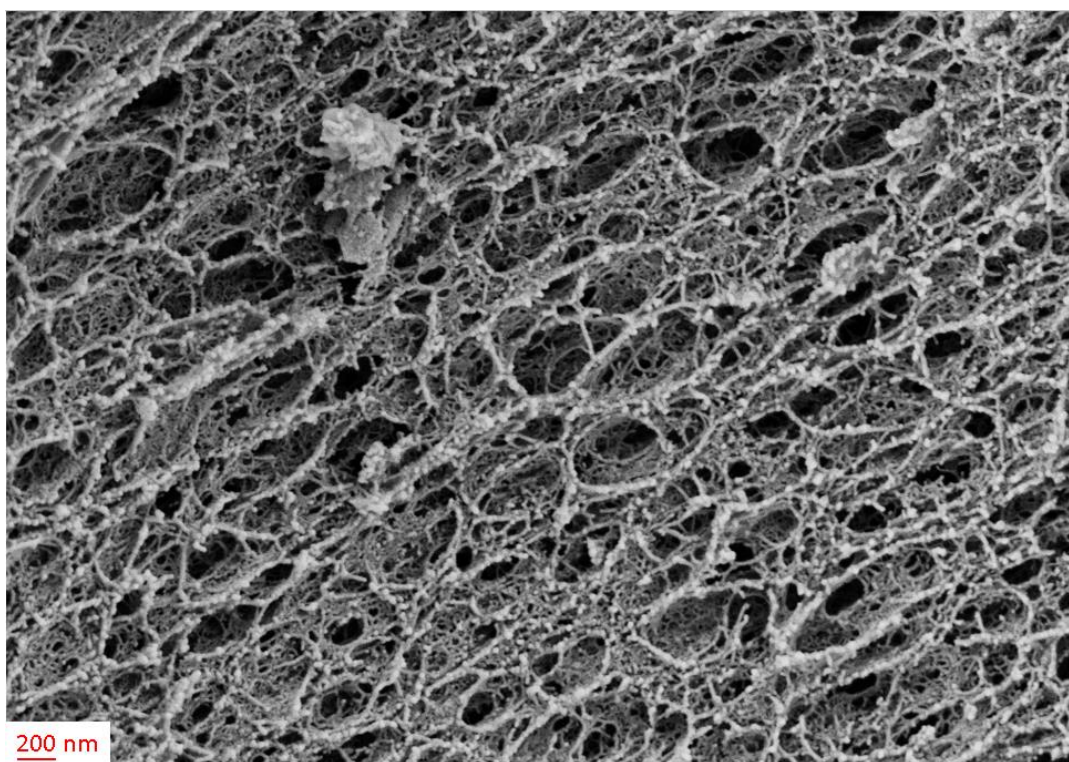

**Figure S22.** SEM picture of pore structure in alginate aerogel after plasma treatment. Coating: C<sub>4</sub>F<sub>8</sub>, mode: PW,  $p_{\text{input}} = 300$  W,  $t = 20$  min.

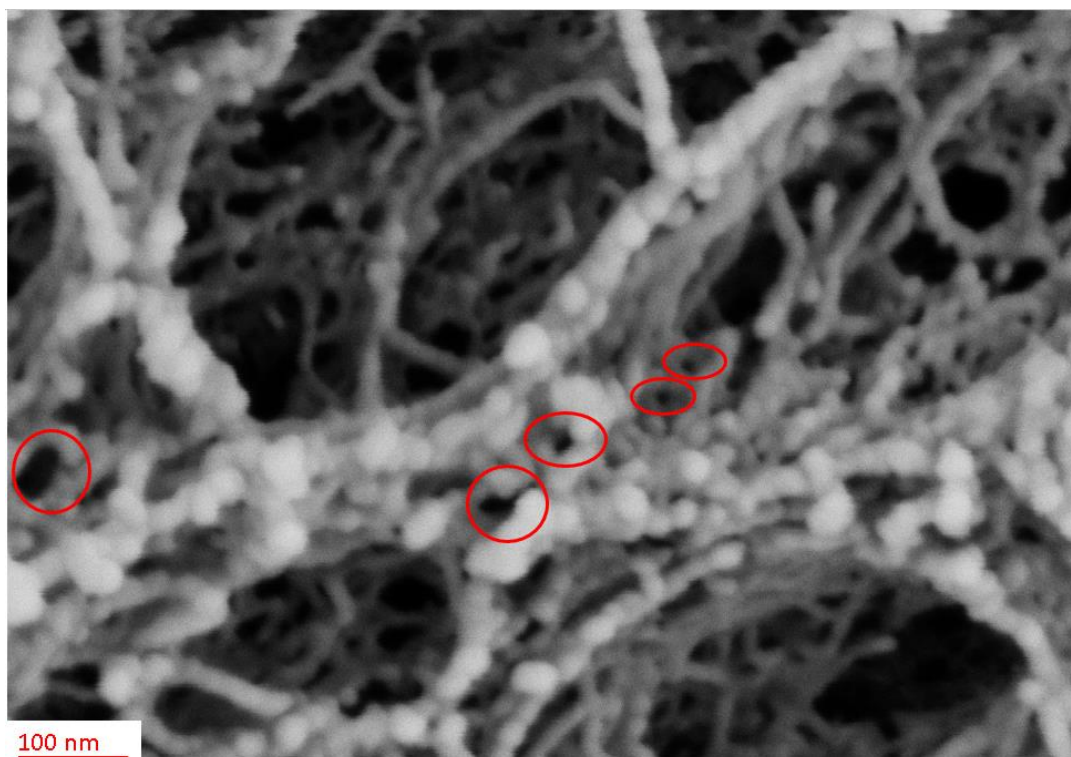

**Figure S23.** SEM picture of pore structure in alginate aerogel after plasma treatment. Coating:  $C_4F_8$ , mode: PW,  $P_{input} = 300$  W,  $t = 20$  min. Some mesopores formed from coating material are highlighted (red circles).

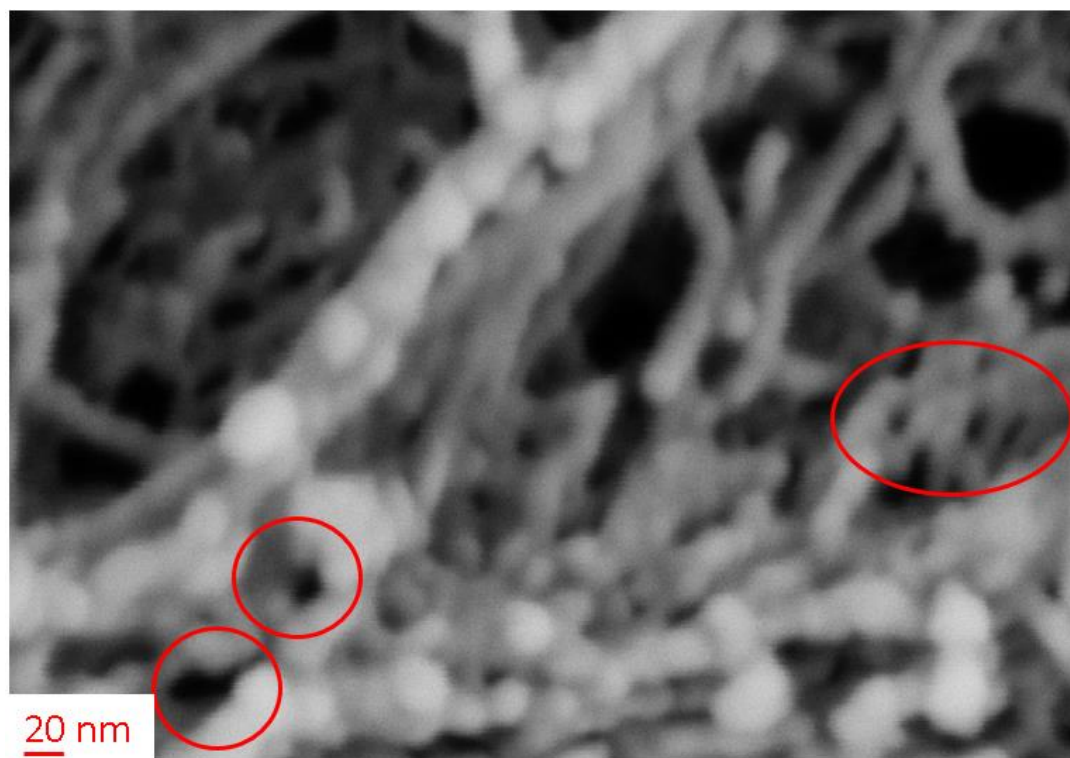

**Figure S24.** SEM picture of pore structure in alginate aerogel after plasma treatment. Coating:  $C_4F_8$ , mode: PW,  $P_{input} = 300$  W,  $t = 20$  min. Some mesopores formed from coating material are highlighted (red circles).
